# Supplementary material for: CircRNA_100367 regulated the radiation sensitivity of esophageal squamous cell carcinomas through miR-217/Wnt3 pathway
Source: PubMed Central journal article supplement (PMC6949088; doi:10.18632/aging.102580), 2019-12-18
Supplement: aging-11-102580-s002..pdf [file aging-11-102580-s002..pdf]

## SUPPLEMENTARY TABLES

**Supplementary Table 1. Sequence information of primers.**

| <b>Primers</b>     | <b>Sequences (5'-3')</b>                            |
|--------------------|-----------------------------------------------------|
| CircRNA_100385     | F: CAGGAGACGTGACTGCTGTG<br>R: TGTCTATTTCCTTCGCTGCT  |
| CircRNA_104983     | F: CCTTTCCATTGCAGCTCCT<br>R: CGCGGTAGTACACACTCAGC   |
| CircRNA_001059     | F: GGC ACTAGGGAGGGACTCAT<br>R: GGCAGAGACAGAGTGGATG  |
| CircRNA_100984     | F: CTGGCTTCAGAAAAGGATGC<br>R: TGAAAAGAGGGAGAGCTGGA  |
| CircRNA_100367     | F: GGC ACTGGAACCAGACTCTC<br>R: GTAGCCAGCCTTTCCTCCTT |
| CircRNA_103783     | F: CTGTTAGCATGATCCCACCAC<br>R: TTTTCCAAGTGTGGCGATTT |
| CircRNA_100312     | F: TTGGCTGAGAACTCCTTCC<br>R: GCTTCTTCCAAGGCCTTCTC   |
| DCAF8              | F: TGGCCTAGACCATGATGTGA<br>R: GTGATGGCGTCTCTGTCTCA  |
| GADPH              | F: AGAAGGCTGGGGCTCATTG<br>R: AGGGGCCATCCACAGTCTTC   |
| WNT3               | F: ACGAGAACTCCCCAACTTT<br>R: AGATGCAGTGGCATTTTTCC   |
| Divergent primers  | F: GGC ACTGGAACCAGACTCTC<br>R: GTAGCCAGCCTTTCCTCCTT |
| Convergent primers | F: GAAGAGGGGAGGGAGACATC<br>R: TCTGTGTCTGTGCCTCGACT  |

Please browse Full Text version to see the data of Supplementary Table 2

**Supplementary Table 2. Predicted targets of miR-217.**
